# Supplementary material for: Prognostic significance of serum cytokines during acute exacerbation of idiopathic interstitial pneumonias treated with thrombomodulin
Source: HighWire-hosted journal article supplement (doi:10.1136/bmjresp-2021-000889), 2021-07-01
Supplement: bmjresp-2021-000889supp001_data_supplement.pdf [file bmjresp-2021-000889supp001_data_supplement.pdf]

**Online supplement**

**Prognostic Significance of Serum Cytokines during Acute Exacerbation of  
Idiopathic Interstitial Pneumonias treated with Thrombomodulin**

**Online supplemental Table S1.** Patient characteristics of the subjects with serum sample in this study compared with AE-IIPs without serum sample in SETUP trial\*

| Parameters                                                   | Sample obtained<br>(n=28) | Sample not obtained<br>(n=11) | p-value |
|--------------------------------------------------------------|---------------------------|-------------------------------|---------|
| <b>Stable state</b>                                          |                           |                               |         |
| IPF/Non-IPF                                                  | 8/20                      | 4/7                           | 0.7086  |
| Sex, Male/Female                                             | 21/7                      | 7/4                           | 0.6940  |
| Smoking, y/n                                                 | 19/9                      | 8/3                           | 1.0000  |
| mMRC, $\leq 1 / \geq 2$                                      | 10/18                     | 5/6                           | 0.7181  |
| Stage, I - III / IV                                          | 17/11                     | 7/4                           | 1.0000  |
| LTOT before AE, y/n                                          | 11/17                     | 3/8                           | 0.7129  |
| Prednisolone before AE,<br>y/n                               | 9/19                      | 6/5                           | 0.2773  |
| Antifibrotic drugs, y/n                                      | 5 <sup>#</sup> /23        | 1 <sup>§</sup> /10            | 0.6548  |
| <b>At the time of AE diagnosis</b>                           |                           |                               |         |
| Age, yrs                                                     | 74.5 (69.75–79)           | 72 (64–80)                    | 0.2170  |
| HRCT pattern, diffuse/non-<br>diffuse                        | 12/16                     | 3/8                           | 0.4770  |
| PaO <sub>2</sub> /FiO <sub>2</sub> ratio, $\leq 200 / > 200$ | 17/11                     | 6/5                           | 0.7338  |
| WBC, / $\mu$ L                                               | 10,150 (9,050–12,950)     | 10,700 (8,800–14,340)         | 0.9378  |
| LDH, U/L                                                     | 317.0 (245.5–404.5)       | 381.0 (290.0–451.0)           | 0.3030  |
| KL-6, U/mL                                                   | 1,196 (889–2,142)         | 859 (616–2,251)               | 0.2679  |
| CRP, mg/dL                                                   | 12.38 (5.07–14.28)        | 12.36 (5.05–14.24)            | 1.0000  |
| FDP, $< 10 / \geq 10$ mg/L                                   | 21/7                      | 7/4                           | 0.6940  |
| 90-day survival, y/n                                         | 19/9                      | 7/4                           | 1.0000  |

AE, acute exacerbation; CRP, C-reactive protein; FDP, fibrin degradation product; FiO<sub>2</sub>, fraction of inspired oxygen; HRCT, high-resolution computed tomography; IPF, idiopathic pulmonary fibrosis; IIPs, idiopathic interstitial pneumonias; KL-6, Krebs von den Lungen-6; LDH, lactate dehydrogenase; LTOT, long-term oxygen therapy; mMRC, modified Medical Research Council score; PaO<sub>2</sub>, arterial oxygen tension.

\*Each parameter was compared between the two groups using Fisher's exact test or the Wilcoxon rank-sum test.

#: Pirfenidone (n=5), nintedanib (n=1). In one case, pirfenidone was firstly prescribed and nintedanib was secondary administered. §: Pirfenidone (n=1).

### Online supplementary Table S2. Therapy for AE-IIPs and management of respiratory failure

| Therapy and Management                   | N=28                |
|------------------------------------------|---------------------|
| <b>Therapy</b>                           |                     |
| Steroid pulse, y/n                       | 25/3                |
| Prednisolone, y/n*                       | 27/1                |
| Dose of prednisolone**, mg/kg/day        | 0.980 (0.909–1.017) |
| Immunosuppressant, y/n                   | 5/23                |
| Pirfenidone, y/n                         | 3/25                |
| Nintedanib, y/n                          | 0/28                |
| Antifibrotic drugs#, y/n                 | 3/25                |
| Empiric antibiotics, y/n                 | 28/0                |
| Macrolide, y/n                           | 5/23                |
| Antacids, y/n                            | 27/1                |
| PMX-DHP therapy, y/n                     | 1/27                |
| Thrombomodulin, y/n                      | 28/0                |
| Anticoagulants#, y/n                     | 6/22                |
| Anti-platelet drugs#, y/n                | 5/23                |
| <b>Management of respiratory failure</b> |                     |
| IPPV, y/n                                | 4/24                |
| NPPV, y/n                                | 11/17               |
| IPPV or NPPV, y/n                        | 13/15               |
| NHF, y/n                                 | 9/19                |
| NHF without IPPV, NPPV, y/n              | 5/23                |
| IPPV or NPPV or NHF, y/n                 | 18/10               |

Abbreviations: AE, acute exacerbation; IIPs, idiopathic interstitial pneumonias; rhTM, recombinant human soluble thrombomodulin; AZP, azathioprine; CyA, cyclosporine A; CPA, cyclophosphamide; IPPV, invasive positive pressure ventilation; NPPV, non-invasive positive pressure ventilation; NHF, nasal high flow therapy.

\*AE-IIPs patients with deceased and with no administration of prednisolone during a high-dose methylprednisolone therapy.

\*\*Prednisolone dose is described as the median (IQR).

#: Anticoagulants and anti-platelet drugs were used for comorbidities.

**Online supplementary Table S3.** Clinical parameters according to the usage of antifibrotic drugs before the diagnosis of AE-IIPs (n=28)\*

| Clinical parameters                                          | Usage of antifibrotic drugs (n=5) | No usage of antifibrotic drugs (n=23) | p-value |
|--------------------------------------------------------------|-----------------------------------|---------------------------------------|---------|
| <b>Stable state</b>                                          |                                   |                                       |         |
| Gender, Male/Female                                          | 4/1                               | 17/6                                  | 1.0000  |
| IPF/Non-IPF                                                  | 2/3                               | 6/17                                  | 0.6056  |
| Smoking, y/n                                                 | 3/2                               | 16/7                                  | 1.0000  |
| mMRC, $\leq 1 / \geq 2$                                      | 1/4                               | 9/14                                  | 0.6264  |
| Stage, I - III / IV                                          | 0/5                               | 17/6                                  | 0.0047  |
| LTOT before AE, y/n                                          | 5/0                               | 6/17                                  | 0.0047  |
| Prednisolone before AE, y/n                                  | 1/4                               | 8/15                                  | 1.0000  |
| <b>At the time of AE diagnosis</b>                           |                                   |                                       |         |
| PaO <sub>2</sub> /FiO <sub>2</sub> ratio, $\leq 200 / > 200$ | 3/2                               | 14/9                                  | 1.0000  |
| HRCT, diffuse/non-diffuse                                    | 3/2                               | 9/14                                  | 0.6239  |
| <b>Outcome</b>                                               |                                   |                                       |         |
| 90-day survival, y/n                                         | 1/4                               | 18/5                                  | 0.0256  |

Abbreviations; AE, acute exacerbation; FiO<sub>2</sub>, fraction of inspired oxygen; HRCT, high-resolution computed tomography; IPF, idiopathic pulmonary fibrosis; IIPs, idiopathic interstitial pneumonias; LTOT, long-term oxygen therapy; mMRC, modified Medical Research Council score; PaO<sub>2</sub>, arterial oxygen tension.

\*: Association between usage of antifibrotic drugs and clinical parameters at the stable state and at the time of diagnosis of AE-IIPs was evaluated by Fisher's exact test.

**Online supplementary Table S4.** Serum cytokines of AE-IIPs, Between IPF and non-IPF (n=28)\*

| Parameters           | AE-IPF (n = 8)          | AE-non-IPF (n = 20)     | p-value |
|----------------------|-------------------------|-------------------------|---------|
| IL-ra                | 61.29 (26.06–179.92)    | 163.69 (8.45–426.18)    | 0.6274  |
| IL-2                 | 0.405 (0.307–1.072)     | 0.380 (0.240–0.685)     | 0.5579  |
| IL-4                 | 0.305 (0.197–0.415)     | 0.285 (0.197–0.405)     | 0.9797  |
| IL-5                 | 1.430 (1.010–2.960)     | 1.265 (0.930–2.097)     | 0.7794  |
| IL-6                 | 0.815 (0.250–2.132)     | 0.650 (0.225–1.822)     | 0.6654  |
| IL-7                 | 1.245 (0.660–2.137)     | 1.135 (0.815–1.767)     | 0.8786  |
| IL-8                 | 2.960 (1.895–46.822)    | 4.055 (3.030–6.877)     | 0.7993  |
| IL-9                 | 2.010 (1.787–3.077)     | 1.975 (1.810–2.860)     | 0.9594  |
| IL-10                | 0.880 (0.497–2.060)     | 0.785 (0.537–1.677)     | 0.7026  |
| IL-12                | 0.225 (0.120–0.432)     | 0.140 (0.067–0.390)     | 0.6441  |
| IL-13                | 0.200 (0.082–0.447)     | 0.130 (0.062–0.307)     | 0.2728  |
| IL-17                | 1.065 (0.727–1.722)     | 1.090 (0.870–1.375)     | 0.9189  |
| Eotaxin/CCL11        | 16.890 (9.387–25.122)   | 18.36 (10.93–30.65)     | 0.6841  |
| b-FGF                | 6.025 (4.912–7.772)     | 5.110 (4.720–6.720)     | 0.4263  |
| G-CSF                | 1.560 (0.980–59.422)    | 4.550 (0.690–13.575)    | 0.6829  |
| GM-CSF               | 0.050 (0.025–0.257)     | 0.040 (0.020–0.132)     | 0.5993  |
| IFN $\gamma$         | 0.620 (0.400–2.037)     | 0.820 (0.542–2.047)     | 0.4006  |
| IP-10/CXCL10         | 369.79 (154.25–1111.44) | 546.2 (236.9–1143.0)    | 0.5085  |
| MCP-1/CCL2           | 4.075 (2.360–18.022)    | 6.375 (3.555–17.785)    | 0.1860  |
| MIP-1 $\alpha$ /CCL3 | 0.540 (0.412–17.267)    | 0.685 (0.352–1.165)     | 0.5933  |
| PDGF-BB              | 67.690 (36.397–100.035) | 79.295 (49.235–112.792) | 0.7219  |
| MIP-1 $\beta$ /CCL4  | 246.25 (205.50–490.29)  | 230.64 (187.34–305.07)  | 0.4765  |
| RANTES/CCL5          | 1863 (1672–4891)        | 1859 (1466–3061)        | 0.7602  |
| TNF- $\alpha$        | 4,855 (3.990–11.712)    | 4.385 (3.865–6.170)     | 0.5931  |

Abbreviations; AE, acute exacerbation; IIPs, idiopathic interstitial pneumonias; IPF, idiopathic pulmonary fibrosis; IL, interleukin; CCL, CC chemokine ligand; bFGF, basic fibroblast growth factor; G-CSF; granulocyte colony-stimulating factor; GM-CSF, granulocyte-macrophage colony-stimulating factor; IFN, interferon; IP-10, IFN- $\gamma$  inducible protein; CXCL, CXC chemokine ligand; MCP, monocyte chemotactic protein; MIP, macrophage inflammatory protein; PDGF, platelet-derived growth factor; RANTES, regulated on activation, normal T-cell expressed and secreted; TNF, tumor necrosis factor.

\*: Serum cytokine levels of AE-IPF and AE-non-IPF (pg/mL) were compared with Wilcoxon rank sum test.

**Online supplementary Table S5.**

Association of serum RANTES/CCL5 levels and clinical parameters at the diagnosis of AE-IIPs (n=28)\*

| Parameters                                                   | rho       | p-value |
|--------------------------------------------------------------|-----------|---------|
| <b>Stable state</b>                                          |           |         |
| Gender, Male/Female                                          | 0.0204    | 0.9178  |
| IPF/Non-IPF                                                  | 0.0587    | 0.7666  |
| Smoking, y/n                                                 | 0.0189    | 0.9238  |
| mMRC, $\leq 1 / \geq 2$                                      | 0.1015    | 0.6073  |
| Stage, I - III / IV                                          | -0.3622   | 0.0582  |
| LTOT before AE, y/n                                          | -0.3622   | 0.0582  |
| Prednisolone before AE, y/n                                  | 0.0473    | 0.8109  |
| Antifibrotic drugs, y/n                                      | -0.5484** | 0.0025  |
| <b>At the time of AE diagnosis</b>                           |           |         |
| WBC, / $\mu$ L                                               | 0.0236    | 0.9053  |
| CRP, mg/dL                                                   | 0.2275    | 0.2444  |
| LDH, U/L                                                     | -0.0616   | 0.7555  |
| KL-6, U/mL                                                   | -0.2740   | 0.1583  |
| PaO <sub>2</sub> /FiO <sub>2</sub> ratio, $\leq 200 / > 200$ | 0.2128    | 0.2770  |
| HRCT, diffuse/non-diffuse                                    | -0.1966   | 0.3160  |
| FDP, $< 10 / \geq 10$ mg/dL                                  | -0.0255   | 0.8974  |

Abbreviations: RANTES, regulated on activation, normal T-cell expressed and secreted; AE, acute exacerbation; IIPs, idiopathic interstitial pneumonias; IPF, idiopathic pulmonary fibrosis; mMRC, modified Medical Research Council score; LTOT, long-term oxygen therapy; WBC, white blood cell; CRP, C-reactive protein; LDH, lactate dehydrogenase; KL-6, Krebs von den Lungen-6; PaO<sub>2</sub>, arterial oxygen tension; FiO<sub>2</sub>, fraction of inspired oxygen; HRCT, high-resolution computed tomography; FDP, fibrin degradation product.

\*: Correlation between serum levels of RANTES/CCL5 at the diagnosis of AE (pg/mL) and clinical parameters at AE and stable state was examined by Spearman rank correlation.

\*\* : This result suggested serum levels of RANTES/CCL5 at the diagnosis of AE was significantly lower in patients with AE-IIPs treated with antifibrotic drugs before the diagnosis of AE than the other patients with AE-IIPs.

**Online supplementary Table S6.** Serum cytokines changes from baseline to day 8 (n=22)\*

| Parameters           | AE-IIPs at baseline  | At day 8             | p-value |
|----------------------|----------------------|----------------------|---------|
| IL-ra                | 82.81 (11.83–392.45) | 41.41 (7.60–77.64)   | 0.0025  |
| IL-2                 | 0.405 (0.240–0.745)  | 0.500 (0.347–0.745)  | 0.0551  |
| IL-4                 | 0.300 (0.212–0.417)  | 0.410 (0.290–0.552)  | 0.0010  |
| IL-5                 | 1.265 (0.920–2.215)  | 1.070 (0.607–1.645)  | 0.3790  |
| IL-6                 | 0.480 (0.212–1.425)  | 0.350 (0.265–0.500)  | 0.2189  |
| IL-7                 | 1.245 (0.860–1.845)  | 1.100 (0.630–1.710)  | 0.0530  |
| IL-8                 | 3.410 (2.412–6.397)  | 3.695 (2.225–6.475)  | 0.7417  |
| IL-9                 | 2.115 (1.870–3.060)  | 2.005 (1.650–2.797)  | 0.0358  |
| IL-10                | 0.735 (0.492–1.670)  | 0.480 (0.185–0.820)  | 0.0284  |
| IL-12                | 0.225 (0.120–0.405)  | 0.230 (0.142–0.460)  | 0.5332  |
| IL-13                | 0.165 (0.085–0.350)  | 0.210 (0.115–0.602)  | 0.0064  |
| IL-17                | 1.090 (0.870–1.465)  | 1.240 (0.950–1.702)  | 0.3334  |
| Eotaxin/CCL11        | 18.36 (11.40–31.90)  | 32.91 (22.01–56.75)  | <0.001  |
| b-FGF                | 5.490 (4.720–7.850)  | 6.530 (5.800–8.577)  | 0.0029  |
| G-CSF                | 2.725 (0.690–10.065) | 3.685 (2.185–8.550)  | 0.7299  |
| GM-CSF               | 0.050 (0.020–0.157)  | 0.012 (0.005–0.165)  | 0.7411  |
| IFN $\gamma$         | 0.755 (0.545–2.002)  | 0.300 (0.242–0.602)  | 0.0003  |
| IP-10/CXCL10         | 546.2 (205.9–1119.7) | 281.7 (155.1–615.9)  | 0.0164  |
| MCP-1/CCL2           | 5.460 (3.160–16.035) | 5.535 (3.790–12.717) | 0.8140  |
| MIP-1 $\alpha$ /CCL3 | 0.615 (0.352–1.035)  | 0.445 (0.292–1.090)  | 0.1575  |
| PDGF-BB              | 85.45 (52.89–114.12) | 61.72 (39.51–161.6)  | 0.1256  |
| MIP-1 $\beta$ /CCL4  | 233.4 (191.7–301.0)  | 128.0 (111.6–161.6)  | <0.0001 |
| RANTES/CCL5          | 1883 (1750–3260)     | 1480 (1233–2058)     | 0.0010  |
| TNF- $\alpha$        | 4.385 (3.915–6.345)  | 3.855 (3.072–4.612)  | <0.0001 |

Abbreviations; AE, acute exacerbation; IIPs, idiopathic interstitial pneumonias; IL, interleukin; CCL, CC chemokine ligand; bFGF, basic fibroblast growth factor; G-CSF; granulocyte colony-stimulating factor; GM-CSF, granulocyte-macrophage colony-stimulating factor; IFN, interferon; IP-10, IFN- $\gamma$  inducible protein; CXCL, CXC chemokine ligand; MCP, monocyte chemotactic protein; MIP, macrophage inflammatory protein; PDGF, platelet-derived growth factor; RANTES, regulated on activation, normal T-cell expressed and secreted; TNF, tumor necrosis factor.

\*: Serum levels of each cytokine at AE-onset (pg/mL) were compared with those on day 8 by paired Wilcoxon rank sum test.

**Online supplementary Table S7.**

Association of serum  $\Delta$ IL-10\* levels and clinical parameters at the onset of AE-IIPs (n=22)\*\*

| Parameters                                                   | rho     | p-value |
|--------------------------------------------------------------|---------|---------|
| <b>Stable state</b>                                          |         |         |
| Gender, Male/Female                                          | -0.0483 | 0.8311  |
| IPF/Non-IPF                                                  | -0.3591 | 0.1007  |
| Smoking, y/n                                                 | -0.1126 | 0.6117  |
| mMRC, $\leq 1 / \geq 2$                                      | -0.0805 | 0.7219  |
| Stage, I -III / IV                                           | 0.0223  | 0.9214  |
| LTOT before AE, y/n                                          | 0.0223  | 0.9214  |
| Prednisolone before AE                                       | 0.0154  | 0.9458  |
| Antifibrotic drugs, y/n                                      | -0.3241 | 0.1412  |
| <b>At the time of AE diagnosis</b>                           |         |         |
| WBC, / $\mu$ L                                               | -0.0385 | 0.8650  |
| CRP, mg/dL                                                   | -0.1226 | 0.5869  |
| LDH, U/L                                                     | 0.2576  | 0.2471  |
| KL-6, U/mL                                                   | 0.2299  | 0.3034  |
| PaO <sub>2</sub> /FiO <sub>2</sub> ratio, $\leq 200 / > 200$ | -0.0573 | 0.7999  |
| HRCT, diffuse/non-diffuse                                    | 0.1341  | 0.5519  |
| FDP, $< 10 / \geq 10$ mg/dL                                  | 0.2309  | 0.3013  |

Abbreviations: AE, acute exacerbation; IIPs, idiopathic interstitial pneumonias; RANTES, regulated on activation, normal T-cell expressed and secreted; AE, acute exacerbation; IIP, idiopathic interstitial pneumonia; IPF, idiopathic pulmonary fibrosis; mMRC, modified Medical Research Council score; LTOT, long-term oxygen therapy; WBC, white blood cell; CRP, C-reactive protein; LDH, lactate dehydrogenase; KL-6, Krebs von den Lungen-6; PaO<sub>2</sub>, arterial oxygen tension; FiO<sub>2</sub>, fraction of inspired oxygen; HRCT, high-resolution computed tomography; FDP, fibrin degradation product.

\*:  $\Delta$ IL-10 means increase in serum levels of IL-10 on day 8 compared with those at AE onset.

\*\* : Correlation between serum levels of  $\Delta$ IL-10 on day 8 (pg/mL) and clinical parameters at AE and stable state was examined by Spearman rank correlation.



## Online supplementary Figure S1

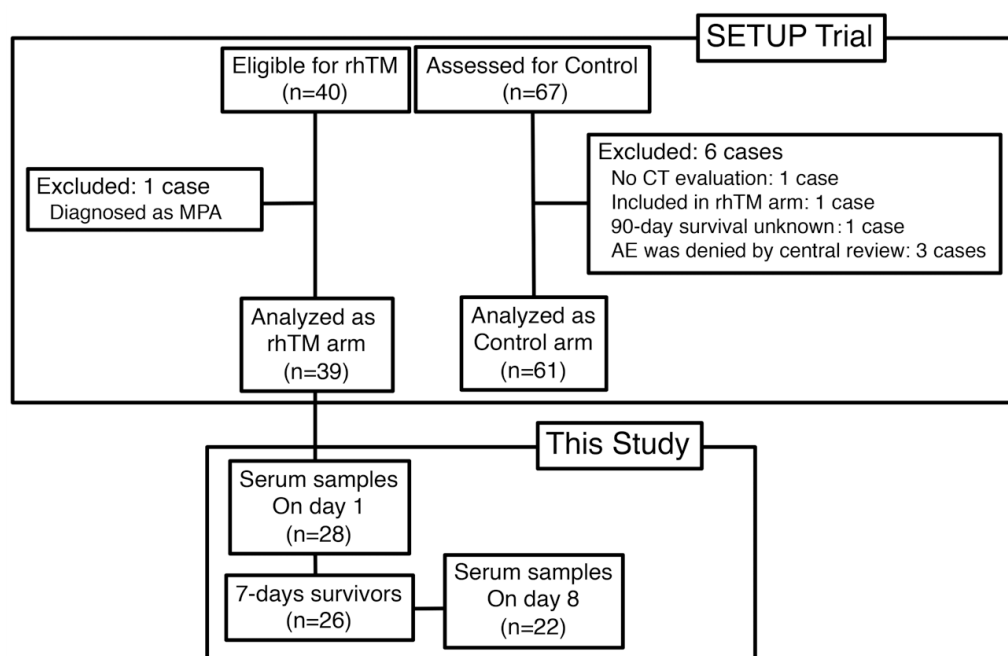

Subjects of this study were selected from those in the SETUP trial. From October 2014 to March 2016, 40 cases of AE-IIPs were prospectively enrolled and treated with rhTM and conventional therapy. One case was excluded from the trial, with 39 cases included in the rhTM arm. As the control arm, 67 consecutive AE-IIPs cases were diagnosed and treated with conventional therapy without rhTM between 2011 and 2013 and 6 cases were excluded by central assessment. Sixty-one cases were included in the control arm. Serum samples on day 1 were obtained from 28 AE-IIPs patients out of 39 AE-IIPs patients in rhTM arm. Twenty-six AE-IIPs patients survived for more than 7 days and serum samples on day 8 were obtained from 22 patients out of the 26 patients.

Abbreviations: MPA, microscopic polyangiitis; AE, acute exacerbation; rhTM, recombinant human soluble thrombomodulin; IIPs, idiopathic interstitial pneumonias; FDP, fibrin degradation product.
